# Supplementary material for: Absence of Elovl6 attenuates steatohepatitis but promotes gallstone formation in a lithogenic diet-fed Ldlr−/− mouse model
Source: PubMed Central journal article supplement (PMC4664962; doi:10.1038/srep17604), 2015-12-01
Supplement: srep17604-s1.pdf [file srep17604-s1.pdf]

## **Supplementary Information**

### **Absence of *Elovl6* attenuates steatohepatitis but promotes gallstone formation in a lithogenic diet-fed *Ldlr*<sup>-/-</sup> mouse model**

**Motoko Kuba, Takashi Matsuzaka, Rie Matsumori, Ryo Saito, Naoko Kaga, Hikari Taka,**

**Kei Ikehata, Naduki Okada, Takuya Kikuchi, Hiroshi Ohno, Song-iee Han, Yoshinori**

**Takeuchi, Kazuto Kobayashi, Hitoshi Iwasaki, Shigeru Yatoh, Hiroaki Suzuki, Hirohito**

**Sone, Naoya Yahagi, Yoji Arakawa, Tsutomu Fujimura, Yoshimi Nakagawa,**

**Nobuhiro Yamada, and Hitoshi Shimano**

## Supplementary Table S1

### The Composition of the Lithogenic Diet (LD)

| Composition      | %       |
|------------------|---------|
| Cacao butter     | 7.500   |
| Cholesterol      | 1.250   |
| Cholate          | 0.500   |
| Milk casein      | 7.500   |
| Cellulose        | 1.250   |
| Vitamin mix      | 1.000   |
| Mineral mix      | 1.000   |
| Sucrose          | 1.625   |
| Glucose          | 1.625   |
| Dextran          | 1.625   |
| Choline chloride | 0.125   |
| Lard             | 3.000   |
| CRF-1            | 72.000  |
| Total            | 100.000 |

**Supplementary Table S2**

**Sequence information for the quantitative Real-time PCR analysis**

| <b>Gene name</b> | <b>Forward primer<br/>(5' to 3')</b> | <b>Reverse primer<br/>(5' to 3')</b> |
|------------------|--------------------------------------|--------------------------------------|
| <i>Acat2</i>     | CCCGTGGTCATCGTCTCAG                  | GGACAGGGCACCATTGAAGG                 |
| <i>Nr1h3</i>     | AGCAACAGTGTAACAGGCGCT                | ACGATGGCCAGCTCAGTAAAGT               |
| <i>Ces3a</i>     | ACTGGGACCTCTTCGGTTCT                 | GGTGAATCTGCTGTTGCTCA                 |
| <i>Ces3b</i>     | CACAGACCGCATGGTAAATG                 | TTGATGCTGGCATCTCTCAC                 |
| <i>Nr1h4</i>     | CTCTGCTCACAGCGATCGTC                 | CACCGCCTCTCTGTCTTGA                  |
| <i>Nr5a2</i>     | ATACAAACTCCCGCTGATCG                 | AAGTCGCGTTCAACAACCTC                 |
| <i>Nr0b2</i>     | CGATCCTCTTCAACCCAGATG                | AGGGCTCCAAGACTTCACACA                |
| <i>Cyp7a1</i>    | GCTGAGAGCTTGAAGCACAAGA               | TTGAGATGCCAGAGGATCAC                 |
| <i>Cyp8b1</i>    | CTAGGGCCTAAAGGTTTCGAGT               | GTAGCCGAATAAGCTCAGGAAG               |
| <i>Cyp27a1</i>   | CCAGGCACAGGAGAGTACG                  | GGGCAAGTGCAGCACATAG                  |
| <i>Cyp7b1</i>    | AGCCGATTATCAGCGAAAGCC                | GCATCCAAAGGTTTGCCTTGT                |
| <i>Slc10a1</i>   | AGGGGGACATGAACCTCAG                  | TCCGTCGTAGATTCCTTTGC                 |
| <i>Slco1a1</i>   | ACTCCATAATGCCCTTGG                   | TAATCGGGCCAACAATCTTC                 |
| <i>Abcb11</i>    | CAATGTTTCAGTTCCTCCGTTCA              | TCTCTTTGGTGTTGTCCCATA                |
| <i>Abcc1</i>     | GATGGCTCCGATCCACTCT                  | AGGTAGAAACAAGGCACCCA                 |
| <i>Abcc2</i>     | TCCAGGACCAAGAGTTTGC                  | TCTGTGAGTGCAAGAGACAGGT               |
| <i>Abcc3</i>     | TGAAGACTGCACCGTACTGAC                | AGAAACCCTTGGAATGCATC                 |
| <i>Abcc4</i>     | AGCTTCAACGGTACTGGGATA                | TCGTCGGGGTCATACTTCTC                 |
| <i>Slc51b</i>    | AGAGAAAGCTGCAGCCAATG                 | CCAGGACCAGGATGGAATAA                 |
| <i>Cd14</i>      | GAAGCAGATCTGGGGCAGTT                 | CGCAGGGCTCCGAATAGAAT                 |
| <i>Cybb</i>      | TTGGGTCAGCACTGGCTCTG                 | TGGCGGTGTGCAGTGCTATC                 |

# Supplementary Figure S1

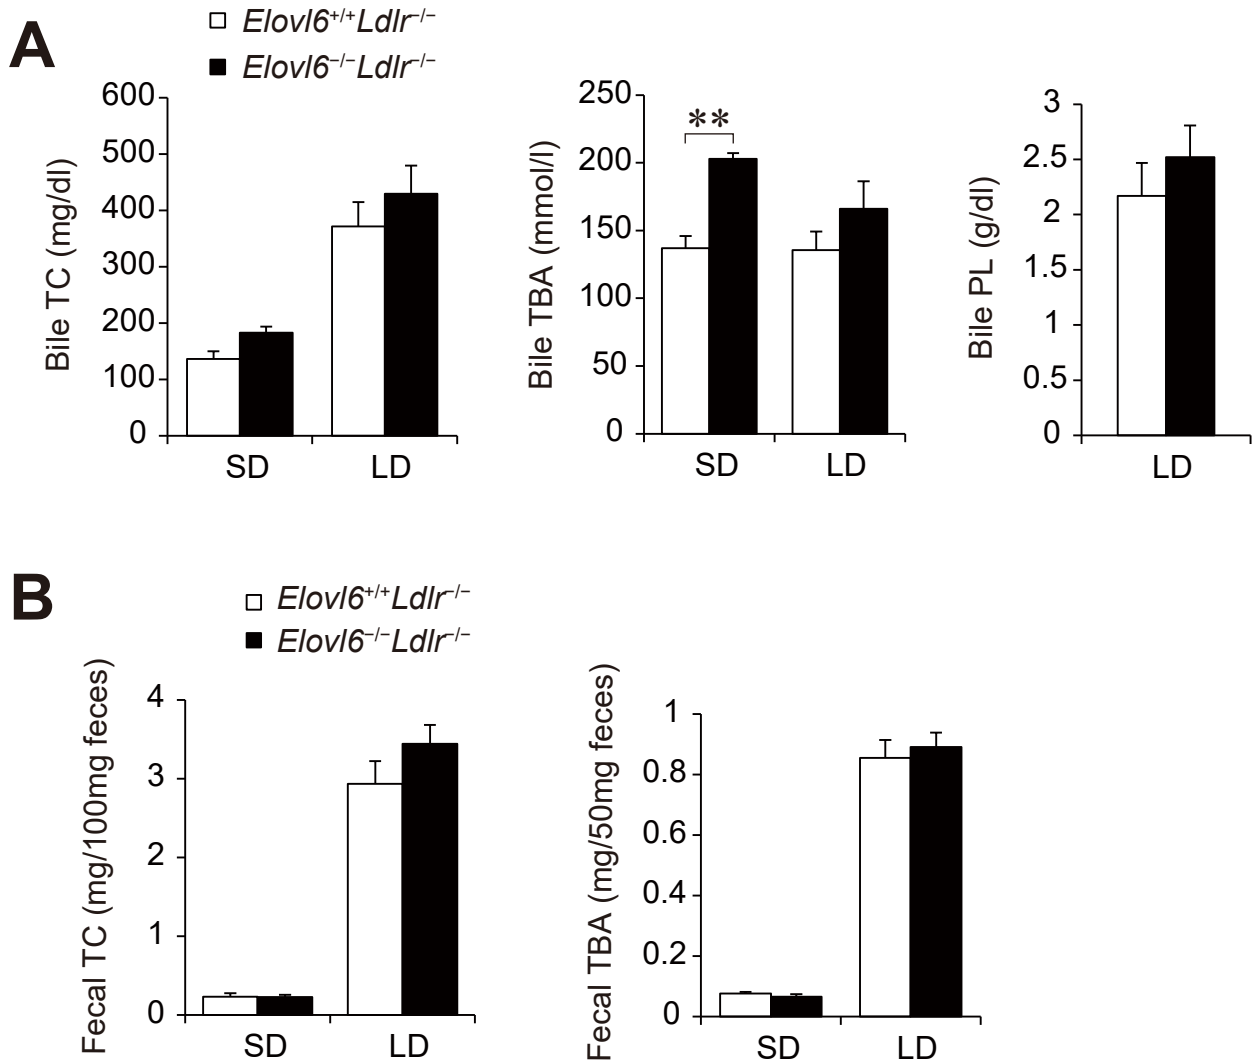



# Supplementary Figure S3

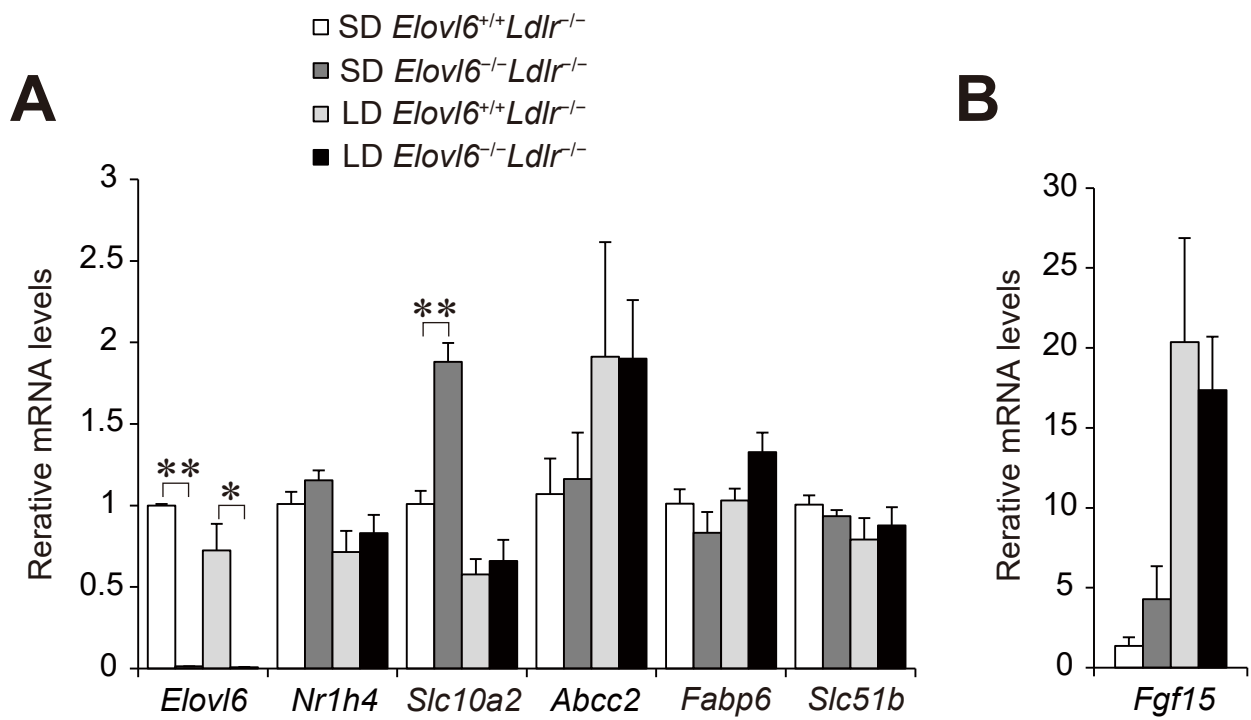

# Supplementary Figure S4

## Effects of LD on $Ldlr^{-/-}$

## Effects of LD on $Elovl6^{-/-}$

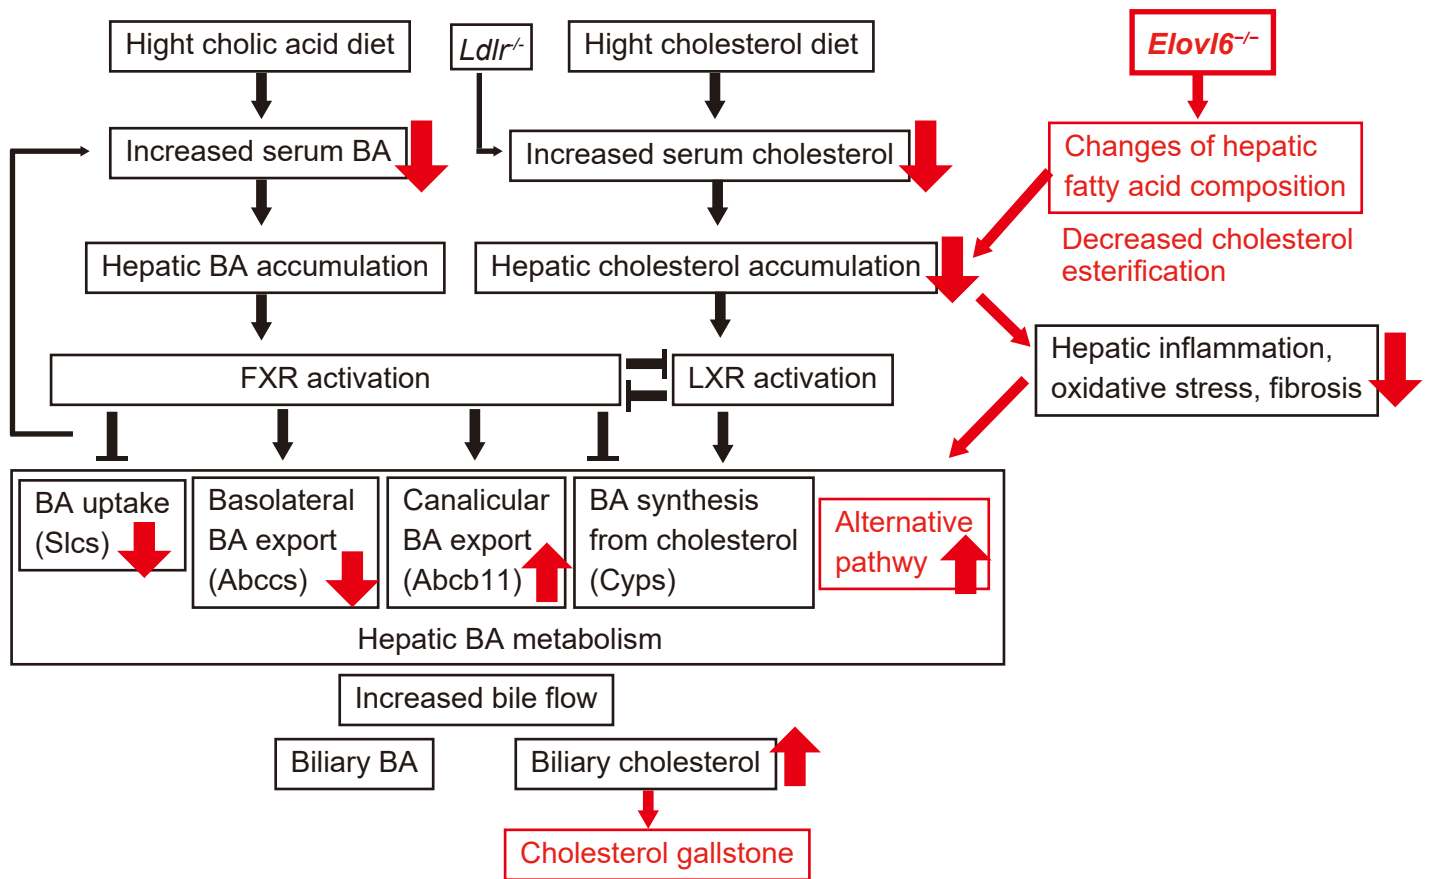

## Supplementary Figure Legends

**Supplementary Figure S1.** Bile and fecal lipid profiles of LD-fed *Ldlr*<sup>-/-</sup> mice lacking Elov16.

(A) Bile total cholesterol (TC), total bile acid (TBA), and phospholipid (PL) levels (n = 3–8 per group) and (B) fecal TC and TBA levels (n = 7–10 per group) of *Elov16*<sup>+/+</sup>*Ldlr*<sup>-/-</sup> and *Elov16*<sup>-/-</sup>*Ldlr*<sup>-/-</sup> mice fed a SD or a LD for 4 weeks.

**Supplementary Figure S2.** Bile acid composition in (A) liver, (B) bile, and (C) plasma in

*Elov16*<sup>+/+</sup>*Ldlr*<sup>-/-</sup> and *Elov16*<sup>-/-</sup>*Ldlr*<sup>-/-</sup> mice fed a SD or a LD for 4 weeks (n = 3–9 per group).

individual BA species were examined by LC/MS. CA, cholic acid; GCA, glycocholic acid; DCA, deoxycholic acid; TDCA, taurodeoxycholic acid; TCA, taurocholic acid; CDCA, chenodeoxycholic acid;  $\alpha$ MCA, alpha-muricholic acid;  $\beta$ MCA, beta-muricholic acid;  $\omega$ MCA, omega-muricholic acid; UDCA, ursodeoxycholic acid; HDCA, hyodeoxycholic acid; TCDCA, taurochenodeoxycholic acid; TUDCA, tauroursodeoxycholic acid; THDCA, taurouhyodeoxycholic acid; T $\alpha$ MCA, tauro- $\alpha$ -muricholic acid; T $\beta$ MCA, tauro- $\beta$ -muricholic acid; T $\omega$ MCA, tauro- $\omega$ -muricholic acid; LCA, lithocholic acid; TLCA, tauroolithocholic acid; GDCA, glycodeoxycholic acid; GCDCA, glycochenodeoxycholic acid; GUDCA, glyoursodeoxycholic acid; GHDCa, glycouhyodeoxycholic acid. \*  $P < 0.05$ , \*\*  $P < 0.01$ .



**Supplementary Figure S3.** Quantitative real-time PCR (qPCR) analysis of genes involved in bile acid homeostasis in the ileum. *Elov16<sup>+/+</sup>Ldlr<sup>-/-</sup>* and *Elov16<sup>-/-</sup>Ldlr<sup>-/-</sup>* mice were fed a SD or a LD for 4 weeks and sacrificed following 4 h of food deprivation (n = 4–7 per group). qPCR analysis of genes for (A) *Elov16*, *Nr1h4*, *Slc10a2*, *Abcc2*, *Fabp6*, *Slc51b* and (B) *Fgf15*. \*  $P < 0.05$ , \*\*  $P < 0.01$ .

**Supplementary Figure S4.** Proposed mechanism of *Elov16*-mediated metabolic alteration in LD-induced liver injury and gallstone formation.

## **Supplementary Methods**

### **Individual bile acid analysis by Liquid Chromatography/Mass Spectrometry**

We determined individual bile salt compositions by liquid chromatography/mass spectrometry.

BA standards were purchased from Sigma. For liver samples, approximately 100 mg of liver was homogenized in 2.5 volumes of H<sub>2</sub>O. d<sub>4</sub>-CA (Internal standard: IS) and 400 µl of ice-cold ethanol were added to 200 µl liver homogenate. Samples were vortexed, centrifuged, and the supernatants were evaporated before being reconstituted in a 200 µl of 50:50 solution of ethanol and water. For plasma samples, 450 µl of ice-cold EtOH was added to 50 µl plasma-spiked with IS, vortexed, and centrifuged. The supernatants were evaporated and reconstituted in a 100 µl of 50:50 solution of ethanol and water. Bile samples were diluted 100- and 2000-fold with a 50:50 solution of ethanol and water, and IS was added. The LC system used was a HPLC (Gilson) equipped with an autoinjector. The HPLC was connected to a TSQ Quantum Ultra (Thermo Scientific). Individual BAs were eluted with gradient at a 0.2 ml/min flow rate for a mobile phase A (10 mM AcONH<sub>4</sub> in H<sub>2</sub>O) and mobile phase B (10 mM AcONH<sub>4</sub> in a 23:17 solution of CH<sub>3</sub>CN and ethanol). The samples were eluted with 80% mobile phase A and 20% mobile phase B for an initial 5 min after injection, and then with a linear gradient of mobile phase B of 20% to 75% over 55 min, which was held for 5 min. The injection volume of all samples was 5 µl. Quantitative analysis was performed in negative ionization mode using the selected reaction

monitoring transitions specific for each BA.
